# Supplementary material for: Overall control of the quality consistency of Citri Retriculatae Pericapium by combining HPLC fingerprint, terahertz time-domain spectroscopy and chemometrics
Source: Royal Society of Chemistry journal article supplement (doi:10.1039/d3nj04725c), 2024-01-01
Supplement: d3nj04725c1.pdf [file d3nj04725c1.pdf]

## Supplementary Information

### **Overall control of quality consistency of Citri Retriculatae Pericarpium by combining HPLC fingerprint, terahertz time-domain spectroscopy and chemometrics**

Xinyi Wang<sup>a</sup>, Jiajia Fan<sup>a</sup>, Yong Guo<sup>a, \*</sup>, Guoxiang Sun<sup>a, \*</sup>, Lili Lan<sup>a, \*</sup>, Qian Li<sup>b, \*</sup>

<sup>a</sup> College of Pharmacy, Shenyang Pharmaceutical University, Wenhua Road 103, Shenyang, 110016, P. R. China.

<sup>b</sup> China Communication Technology (Jiang Men) Corporation, Guangdong, China.

\* Corresponding author.

---

|                                                                                                                                                                                                                                                                                                   |    |
|---------------------------------------------------------------------------------------------------------------------------------------------------------------------------------------------------------------------------------------------------------------------------------------------------|----|
| 1 Supplementary Figure.....                                                                                                                                                                                                                                                                       | 3  |
| Fig.S1 Dotted line graph of reliability parameters and QRFP quality rating levels for 199 batches of CRP (A). <i>Sm</i> and <i>Pm</i> dotted line plots of 199 batches of CRP samples (B).....                                                                                                    | 3  |
| Fig.S2 HPLC-FP of 199 batches of CRP .....                                                                                                                                                                                                                                                        | 4  |
| Fig.S3 PCA plots of HPLC-FP peak areas for different varieties, years and origins of CRP (A, B, C). <i>P<sub>m</sub></i> and <i>S<sub>m</sub></i> median scatter plots of QRFM evaluation results for 199 batches of CRP (D). Histogram of DHP, EHP and QP year identification results (E). ..... | 5  |
| Fig.S4 DHP, EHP and QP1-5 years score plots (A, B, C). THz-TDs plots for 199 batches of samples. ....                                                                                                                                                                                             | 6  |
| 2 Supplementary Tables .....                                                                                                                                                                                                                                                                      | 7  |
| Table S1 Table of origin, year and species information for 100 CRP sample batches. ..                                                                                                                                                                                                             | 7  |
| Table S2 The quality grade assigned by SQFM and Reliability classification table. ...                                                                                                                                                                                                             | 12 |
| Table S3 Regression equations, correlation coefficients (r), linearity, LOD, and LOQ for the five markers. ....                                                                                                                                                                                   | 13 |
| Table S4 Results of the evaluation of HPLC, THz-TDs and their synthesis by QRFM. ....                                                                                                                                                                                                             | 14 |

1 Supplementary Figure

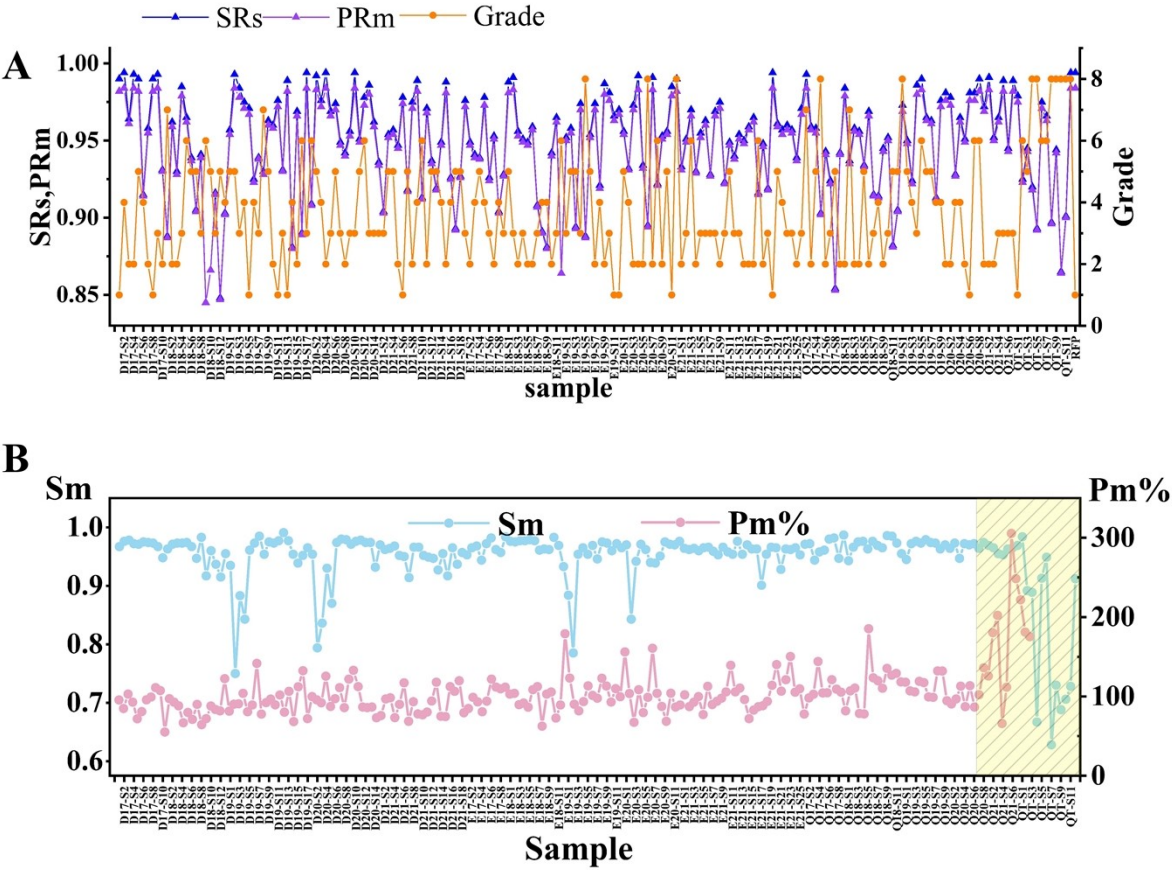

**Fig.S1** Dotted line graph of reliability parameters and QRFP quality rating levels for 199 batches of CRP (A). *Sm* and *Pm* dotted line plots of 199 batches of CRP samples (B).

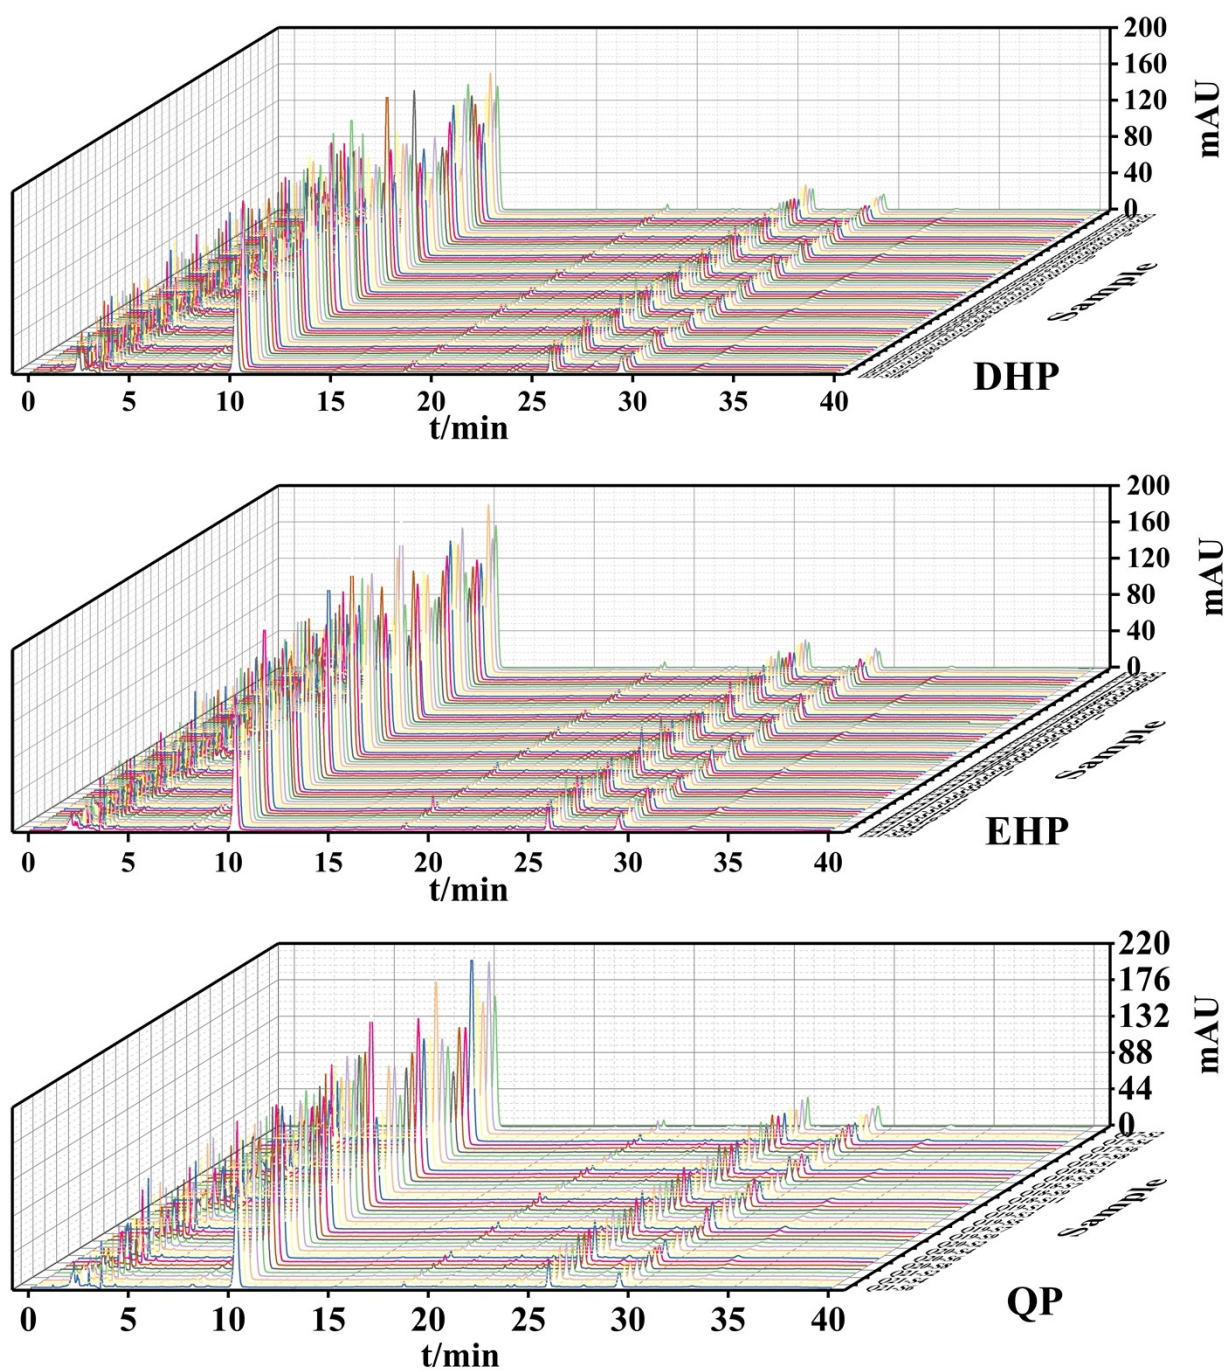

Fig.S2 HPLC-FP of 199 batches of CRP

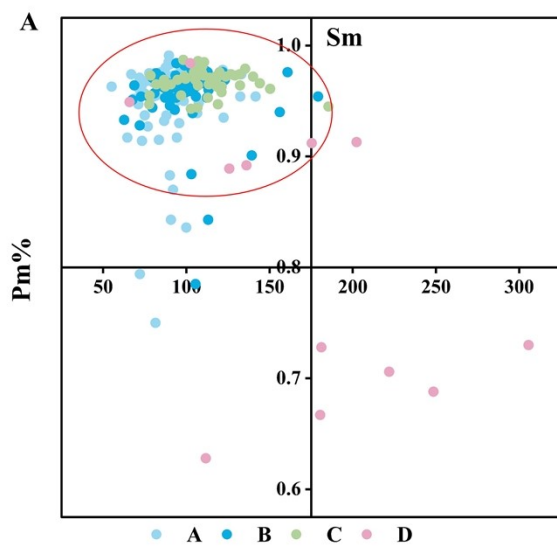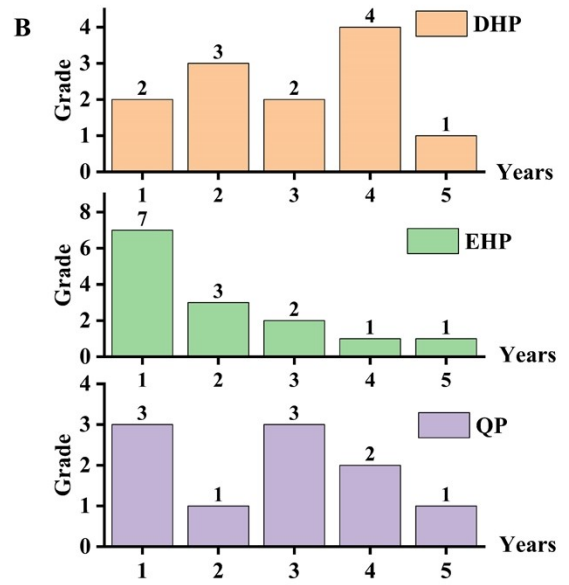

**Fig.S3**  $P_m$  and  $S_m$  median scatter plots of QRFM evaluation results for 199 batches of CRP (A). Histogram of DHP, EHP and QP year identification results (B).

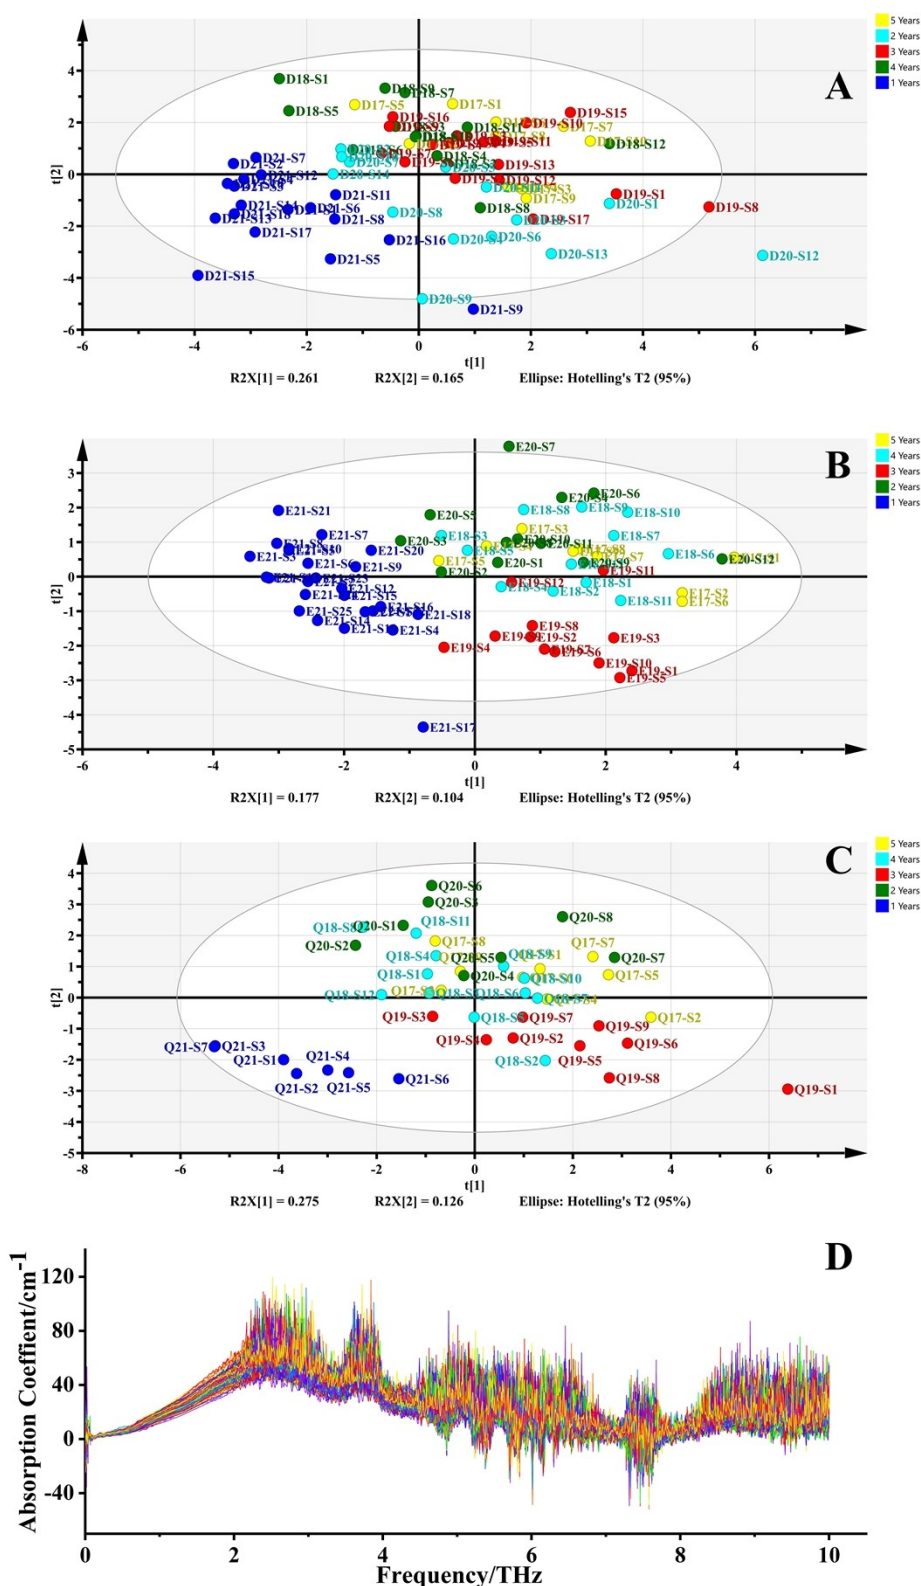

**Fig.S4** DHP, EHP and QP1-5 years score plots (A, B, C). THz-TDs plots for 199 batches of samples.

## 2 Supplementary Tables

**Table S1** Table of origin, year and species information for 100 CRP sample batches.

| Classification | Sample  | Vintages | Varietals | Origins            |
|----------------|---------|----------|-----------|--------------------|
| APA            | Q17-S1  | 2017     | QP        | Guangdong , Xinhui |
|                | Q17-S2  | 2017     | QP        | Guangdong , Xinhui |
|                | Q17-S3  | 2017     | QP        | Guangdong , Xinhui |
|                | Q17-S4  | 2017     | QP        | Guangdong , Xinhui |
|                | Q17-S5  | 2017     | QP        | Guangdong , Xinhui |
|                | Q17-S6  | 2017     | QP        | Guangdong , Xinhui |
|                | Q17-S7  | 2017     | QP        | Guangdong , Xinhui |
|                | Q17-S8  | 2017     | QP        | Guangdong , Xinhui |
|                | Q17-S9  | 2017     | QP        | Guangdong , Xinhui |
|                | Q18-S1  | 2018     | QP        | Guangdong , Xinhui |
|                | Q18-S2  | 2018     | QP        | Guangdong , Xinhui |
|                | Q18-S3  | 2018     | QP        | Guangdong , Xinhui |
|                | Q18-S4  | 2018     | QP        | Guangdong , Xinhui |
|                | Q18-S5  | 2018     | QP        | Guangdong , Xinhui |
|                | Q18-S6  | 2018     | QP        | Guangdong , Xinhui |
|                | Q18-S7  | 2018     | QP        | Guangdong , Xinhui |
|                | Q18-S8  | 2018     | QP        | Guangdong , Xinhui |
|                | Q18-S9  | 2018     | QP        | Guangdong , Xinhui |
|                | Q18-S10 | 2018     | QP        | Guangdong , Xinhui |
|                | Q18-S11 | 2018     | QP        | Guangdong , Xinhui |
|                | Q18-S12 | 2018     | QP        | Guangdong , Xinhui |
|                | Q19-S1  | 2019     | QP        | Guangdong , Xinhui |
|                | Q19-S2  | 2019     | QP        | Guangdong , Xinhui |
|                | Q19-S3  | 2019     | QP        | Guangdong , Xinhui |
|                | Q19-S4  | 2019     | QP        | Guangdong , Xinhui |
|                | Q19-S5  | 2019     | QP        | Guangdong , Xinhui |
|                | Q19-S6  | 2019     | QP        | Guangdong , Xinhui |
|                | Q19-S7  | 2019     | QP        | Guangdong , Xinhui |
|                | Q19-S8  | 2019     | QP        | Guangdong , Xinhui |
|                | Q19-S9  | 2019     | QP        | Guangdong , Xinhui |
|                | Q20-S1  | 2020     | QP        | Guangdong , Xinhui |
|                | Q20-S2  | 2020     | QP        | Guangdong , Xinhui |
|                | Q20-S3  | 2020     | QP        | Guangdong , Xinhui |
|                | Q20-S4  | 2020     | QP        | Guangdong , Xinhui |
|                | Q20-S5  | 2020     | QP        | Guangdong , Xinhui |
|                | Q20-S6  | 2020     | QP        | Guangdong , Xinhui |
|                | Q20-S7  | 2020     | QP        | Guangdong , Xinhui |
|                | Q20-S8  | 2020     | QP        | Guangdong , Xinhui |
|                | Q21-S1  | 2021     | QP        | Guangdong , Xinhui |
|                | Q21-S2  | 2021     | QP        | Guangdong , Xinhui |



|         |      |     |                    |
|---------|------|-----|--------------------|
| Q21-S3  | 2021 | QP  | Guangdong , Xinhui |
| Q21-S4  | 2021 | QP  | Guangdong , Xinhui |
| Q21-S5  | 2021 | QP  | Guangdong , Xinhui |
| Q21-S6  | 2021 | QP  | Guangdong , Xinhui |
| Q21-S7  | 2021 | QP  | Guangdong , Xinhui |
| E17-S1  | 2017 | EHP | Guangdong , Xinhui |
| E17-S2  | 2017 | EHP | Guangdong , Xinhui |
| E17-S3  | 2017 | EHP | Guangdong , Xinhui |
| E17-S4  | 2017 | EHP | Guangdong , Xinhui |
| E17-S5  | 2017 | EHP | Guangdong , Xinhui |
| E17-S6  | 2017 | EHP | Guangdong , Xinhui |
| E17-S7  | 2017 | EHP | Guangdong , Xinhui |
| E17-S8  | 2017 | EHP | Guangdong , Xinhui |
| E17-S9  | 2017 | EHP | Guangdong , Xinhui |
| E18-S1  | 2018 | EHP | Guangdong , Xinhui |
| E18-S2  | 2018 | EHP | Guangdong , Xinhui |
| E18-S3  | 2018 | EHP | Guangdong , Xinhui |
| E18-S4  | 2018 | EHP | Guangdong , Xinhui |
| E18-S5  | 2018 | EHP | Guangdong , Xinhui |
| E18-S6  | 2018 | EHP | Guangdong , Xinhui |
| E18-S7  | 2018 | EHP | Guangdong , Xinhui |
| E18-S8  | 2018 | EHP | Guangdong , Xinhui |
| E18-S9  | 2018 | EHP | Guangdong , Xinhui |
| E18-S10 | 2018 | EHP | Guangdong , Xinhui |
| E18-S11 | 2018 | EHP | Guangdong , Xinhui |
| E18-S12 | 2018 | EHP | Guangdong , Xinhui |
| E19-S1  | 2019 | EHP | Guangdong , Xinhui |
| E19-S2  | 2019 | EHP | Guangdong , Xinhui |
| E19-S3  | 2019 | EHP | Guangdong , Xinhui |
| E19-S4  | 2019 | EHP | Guangdong , Xinhui |
| E19-S5  | 2019 | EHP | Guangdong , Xinhui |
| E19-S6  | 2019 | EHP | Guangdong , Xinhui |
| E19-S7  | 2019 | EHP | Guangdong , Xinhui |
| E19-S8  | 2019 | EHP | Guangdong , Xinhui |
| E19-S9  | 2019 | EHP | Guangdong , Xinhui |
| E19-S10 | 2019 | EHP | Guangdong , Xinhui |
| E19-S11 | 2019 | EHP | Guangdong , Xinhui |
| E19-S12 | 2019 | EHP | Guangdong , Xinhui |
| E20-S1  | 2020 | EHP | Guangdong , Xinhui |
| E20-S2  | 2020 | EHP | Guangdong , Xinhui |
| E20-S3  | 2020 | EHP | Guangdong , Xinhui |
| E20-S4  | 2020 | EHP | Guangdong , Xinhui |
| E20-S5  | 2020 | EHP | Guangdong , Xinhui |



|         |      |     |                    |
|---------|------|-----|--------------------|
| E20-S6  | 2020 | EHP | Guangdong , Xinhui |
| E20-S7  | 2020 | EHP | Guangdong , Xinhui |
| E20-S8  | 2020 | EHP | Guangdong , Xinhui |
| E20-S9  | 2020 | EHP | Guangdong , Xinhui |
| E20-S10 | 2020 | EHP | Guangdong , Xinhui |
| E20-S11 | 2020 | EHP | Guangdong , Xinhui |
| E20-S12 | 2020 | EHP | Guangdong , Xinhui |
| E21-S1  | 2021 | EHP | Guangdong , Xinhui |
| E21-S2  | 2021 | EHP | Guangdong , Xinhui |
| E21-S3  | 2021 | EHP | Guangdong , Xinhui |
| E21-S4  | 2021 | EHP | Guangdong , Xinhui |
| E21-S5  | 2021 | EHP | Guangdong , Xinhui |
| E21-S6  | 2021 | EHP | Guangdong , Xinhui |
| E21-S7  | 2021 | EHP | Guangdong , Xinhui |
| E21-S8  | 2021 | EHP | Guangdong , Xinhui |
| E21-S9  | 2021 | EHP | Guangdong , Xinhui |
| E21-S10 | 2021 | EHP | Guangdong , Xinhui |
| E21-S11 | 2021 | EHP | Guangdong , Xinhui |
| E21-S12 | 2021 | EHP | Guangdong , Xinhui |
| E21-S13 | 2021 | EHP | Guangdong , Xinhui |
| E21-S14 | 2021 | EHP | Guangdong , Xinhui |
| E21-S15 | 2021 | EHP | Guangdong , Xinhui |
| E21-S16 | 2021 | EHP | Guangdong , Xinhui |
| E21-S17 | 2021 | EHP | Guangdong , Xinhui |
| E21-S18 | 2021 | EHP | Guangdong , Xinhui |
| E21-S19 | 2021 | EHP | Guangdong , Xinhui |
| E21-S20 | 2021 | EHP | Guangdong , Xinhui |
| E21-S21 | 2021 | EHP | Guangdong , Xinhui |
| E21-S22 | 2021 | EHP | Guangdong , Xinhui |
| E21-S23 | 2021 | EHP | Guangdong , Xinhui |
| E21-S24 | 2021 | EHP | Guangdong , Xinhui |
| E21-S25 | 2021 | EHP | Guangdong , Xinhui |
| D17-S1  | 2017 | DHP | Guangdong , Xinhui |
| D17-S2  | 2017 | DHP | Guangdong , Xinhui |
| D17-S3  | 2017 | DHP | Guangdong , Xinhui |
| D17-S4  | 2017 | DHP | Guangdong , Xinhui |
| D17-S5  | 2017 | DHP | Guangdong , Xinhui |
| D17-S6  | 2017 | DHP | Guangdong , Xinhui |
| D17-S7  | 2017 | DHP | Guangdong , Xinhui |
| D17-S8  | 2017 | DHP | Guangdong , Xinhui |
| D17-S9  | 2017 | DHP | Guangdong , Xinhui |
| D17-S10 | 2017 | DHP | Guangdong , Xinhui |
| D18-S1  | 2018 | DHP | Guangdong , Xinhui |

|         |      |     |                    |
|---------|------|-----|--------------------|
| D18-S2  | 2018 | DHP | Guangdong , Xinhui |
| D18-S3  | 2018 | DHP | Guangdong , Xinhui |
| D18-S4  | 2018 | DHP | Guangdong , Xinhui |
| D18-S5  | 2018 | DHP | Guangdong , Xinhui |
| D18-S6  | 2018 | DHP | Guangdong , Xinhui |
| D18-S7  | 2018 | DHP | Guangdong , Xinhui |
| D18-S8  | 2018 | DHP | Guangdong , Xinhui |
| D18-S9  | 2018 | DHP | Guangdong , Xinhui |
| D18-S10 | 2018 | DHP | Guangdong , Xinhui |
| D18-S11 | 2018 | DHP | Guangdong , Xinhui |
| D18-S12 | 2018 | DHP | Guangdong , Xinhui |
| D18-S13 | 2018 | DHP | Guangdong , Xinhui |
| D19-S1  | 2019 | DHP | Guangdong , Xinhui |
| D19-S2  | 2019 | DHP | Guangdong , Xinhui |
| D19-S3  | 2019 | DHP | Guangdong , Xinhui |
| D19-S4  | 2019 | DHP | Guangdong , Xinhui |
| D19-S5  | 2019 | DHP | Guangdong , Xinhui |
| D19-S6  | 2019 | DHP | Guangdong , Xinhui |
| D19-S7  | 2019 | DHP | Guangdong , Xinhui |
| D19-S8  | 2019 | DHP | Guangdong , Xinhui |
| D19-S9  | 2019 | DHP | Guangdong , Xinhui |
| D19-S10 | 2019 | DHP | Guangdong , Xinhui |
| D19-S11 | 2019 | DHP | Guangdong , Xinhui |
| D19-S12 | 2019 | DHP | Guangdong , Xinhui |
| D19-S13 | 2019 | DHP | Guangdong , Xinhui |
| D19-S14 | 2019 | DHP | Guangdong , Xinhui |
| D19-S15 | 2019 | DHP | Guangdong , Xinhui |
| D19-S16 | 2019 | DHP | Guangdong , Xinhui |
| D19-S17 | 2019 | DHP | Guangdong , Xinhui |
| D20-S1  | 2020 | DHP | Guangdong , Xinhui |
| D20-S2  | 2020 | DHP | Guangdong , Xinhui |
| D20-S3  | 2020 | DHP | Guangdong , Xinhui |
| D20-S4  | 2020 | DHP | Guangdong , Xinhui |
| D20-S5  | 2020 | DHP | Guangdong , Xinhui |
| D20-S6  | 2020 | DHP | Guangdong , Xinhui |
| D20-S7  | 2020 | DHP | Guangdong , Xinhui |
| D20-S8  | 2020 | DHP | Guangdong , Xinhui |
| D20-S9  | 2020 | DHP | Guangdong , Xinhui |
| D20-S10 | 2020 | DHP | Guangdong , Xinhui |
| D20-S11 | 2020 | DHP | Guangdong , Xinhui |
| D20-S12 | 2020 | DHP | Guangdong , Xinhui |
| D20-S13 | 2020 | DHP | Guangdong , Xinhui |
| D20-S14 | 2020 | DHP | Guangdong , Xinhui |

|      |         |      |              |                     |
|------|---------|------|--------------|---------------------|
|      | D21-S1  | 2021 | DHP          | Guangdong , Xinhui  |
|      | D21-S2  | 2021 | DHP          | Guangdong , Xinhui  |
|      | D21-S3  | 2021 | DHP          | Guangdong , Xinhui  |
|      | D21-S4  | 2021 | DHP          | Guangdong , Xinhui  |
|      | D21-S5  | 2021 | DHP          | Guangdong , Xinhui  |
|      | D21-S6  | 2021 | DHP          | Guangdong , Xinhui  |
|      | D21-S7  | 2021 | DHP          | Guangdong , Xinhui  |
|      | D21-S8  | 2021 | DHP          | Guangdong , Xinhui  |
|      | D21-S9  | 2021 | DHP          | Guangdong , Xinhui  |
|      | D21-S10 | 2021 | DHP          | Guangdong , Xinhui  |
|      | D21-S11 | 2021 | DHP          | Guangdong , Xinhui  |
|      | D21-S12 | 2021 | DHP          | Guangdong , Xinhui  |
|      | D21-S13 | 2021 | DHP          | Guangdong , Xinhui  |
|      | D21-S14 | 2021 | DHP          | Guangdong , Xinhui  |
|      | D21-S15 | 2021 | DHP          | Guangdong , Xinhui  |
|      | D21-S16 | 2021 | DHP          | Guangdong , Xinhui  |
|      | D21-S17 | 2021 | DHP          | Guangdong , Xinhui  |
|      | D21-S18 | 2021 | DHP          | Guangdong , Xinhui  |
| NAPA | QT-S1   | 2018 | Cha Zhi Gan  | Guangdong, Jieyang  |
|      | QT-S2   | 2021 | Huang Di Gan | Guangdong, Zhaoqing |
|      | QT-S3   | 2021 | Sha Tang Ju  | Guangdong, Zhaoqing |
|      | QT-S4   | 2021 | Hong Ju      | Sichuan, Chengdu    |
|      | QT-S5   | 2021 | Peng Gan     | Sichuan, Chengdu    |
|      | QT-S6   | 2021 | Cha Zhi Gan  | Guangdong , Jieyang |
|      | QT-S7   | 2021 | Jiao Gan     | Guangdong , Jieyang |
|      | QT-S8   | 2021 | Mi Gan       | Hubei, Yichang      |
|      | QT-S9   | 2021 | Ju Zi        | Guizhou             |
|      | QT-S10  | 2021 | Wu Zi Mi Ju  | Yunnan              |
|      | QT-S11  | 2021 | Ma Gan       | Zhejiang            |
|      | QT-S12  | 2021 | Huang Di Gan | Guangxi, Wuming     |

**Table S2** The quality grade assigned by SQFM and Reliability classification table.

| Quality grade                    |                       |                  |          |                  |          |           |            |                    |
|----------------------------------|-----------------------|------------------|----------|------------------|----------|-----------|------------|--------------------|
| Par.                             | I                     | II               | III      | IV               | V        | VI        | VII        | VIII               |
| $S_m \geq$                       | 0.95                  | 0.9              | 0.85     | 0.8              | 0.7      | 0.6       | 0.5        | $\leq 0.50$        |
| $P_m \%$                         | 95~105                | 90~110           | 85~115   | 80~120           | 70~130   | 60~140    | 50~150     | 0~ $\infty$        |
| $\alpha \leq$                    | 0.05                  | 0.1              | 0.15     | 0.2              | 0.3      | 0.4       | 0.5        | $> 0.50$           |
| Quality                          | best                  | better           | good     | fine             | moderate | common    | inferior   | defective          |
| Reliability classification table |                       |                  |          |                  |          |           |            |                    |
| Par.                             | R1                    | R2               | R3       | R4               | R5       | R6        | R7         | R8                 |
| $U_i \leq$                       | 0.05                  | 0.1              | 0.15     | 0.2              | 0.3      | 0.4       | 0.5        | $U_i > 0.50$       |
| $R_i \geq$                       | 0.95                  | 0.9              | 0.85     | 0.8              | 0.7      | 0.6       | 0.5        | $R_i < 0.50$       |
| Result                           | extremely<br>reliable | very<br>reliable | reliable | more<br>reliable | moderate | generally | unreliable | very<br>unreliable |

**Table S3** Regression equations, correlation coefficients (r), linearity, LOD, and LOQ for the five markers.

| Components | Regression equation | r      | Linearity<br>(g/mL) | LOD( $\mu\text{g}\cdot\text{g}^{-1}$ ) | LOQ( $\mu\text{g}\cdot\text{g}^{-1}$ ) |
|------------|---------------------|--------|---------------------|----------------------------------------|----------------------------------------|
| NARI       | $Y=0.1323X+0.1222$  | 0.9998 | 1.84~184            | 75                                     | 248                                    |
| NAR        | $Y=0.1441X+0.0678$  | 0.9999 | 1.42~142            | 60                                     | 181                                    |
| HES        | $Y=0.1361X+0.5525$  | 0.9991 | 3.87~387            | 160                                    | 519                                    |
| NOB        | $Y=0.2188X+0.0320$  | 0.9999 | 2.00~200            | 80                                     | 266                                    |
| TAN        | $Y=0.1584X+0.0082$  | 0.9999 | 0.90~90.0           | 35                                     | 117                                    |

**Table S4** Results of the evaluation of HPLC, THz-TDs and their synthesis by QRFM.

| Sample  | HPLC  |         | THz-TDs |         | HPLC+THz-TDs |         |
|---------|-------|---------|---------|---------|--------------|---------|
|         | $S_m$ | $P_m\%$ | $S_m$   | $P_m\%$ | $S_m$        | $P_m\%$ |
| D17-S1  | 0.967 | 95.6    | 0.967   | 98.0    | 0.967        | 96.8    |
| D17-S2  | 0.976 | 84.8    | 0.982   | 103.5   | 0.979        | 94.2    |
| D17-S3  | 0.978 | 102.9   | 0.929   | 96.6    | 0.954        | 99.8    |
| D17-S4  | 0.972 | 92.8    | 0.954   | 85.4    | 0.963        | 89.1    |
| D17-S5  | 0.971 | 71.8    | 0.969   | 91.8    | 0.970        | 81.8    |
| D17-S6  | 0.975 | 80.9    | 0.985   | 94.1    | 0.980        | 87.5    |
| D17-S7  | 0.974 | 95.8    | 0.952   | 94.9    | 0.963        | 95.4    |
| D17-S8  | 0.973 | 99.3    | 0.963   | 93.2    | 0.968        | 96.3    |
| D17-S9  | 0.967 | 111.1   | 0.967   | 102.5   | 0.967        | 106.8   |
| D17-S10 | 0.948 | 107.4   | 0.964   | 88.5    | 0.956        | 98.0    |
| D18-S1  | 0.963 | 55.1    | 0.928   | 95.7    | 0.946        | 75.4    |
| D18-S2  | 0.971 | 97.2    | 0.935   | 101.6   | 0.953        | 99.4    |
| D18-S3  | 0.973 | 92.8    | 0.959   | 106.4   | 0.966        | 99.6    |
| D18-S4  | 0.973 | 88.1    | 0.973   | 103.5   | 0.973        | 95.8    |
| D18-S5  | 0.974 | 66.9    | 0.974   | 88.4    | 0.974        | 77.7    |
| D18-S6  | 0.967 | 79.9    | 0.972   | 94.3    | 0.970        | 87.1    |
| D18-S7  | 0.947 | 71.2    | 0.982   | 92.2    | 0.965        | 81.7    |
| D18-S8  | 0.983 | 90.0    | 0.964   | 92.4    | 0.974        | 91.2    |
| D18-S9  | 0.917 | 64.5    | 0.965   | 88.3    | 0.941        | 76.4    |
| D18-S10 | 0.960 | 72.0    | 0.972   | 104.6   | 0.966        | 88.3    |
| D18-S11 | 0.937 | 88.0    | 0.968   | 82.8    | 0.953        | 85.4    |
| D18-S12 | 0.915 | 83.5    | 0.974   | 99.6    | 0.945        | 91.6    |
| D18-S13 | 0.955 | 81.9    | 0.974   | 97.0    | 0.965        | 89.5    |
| D19-S1  | 0.935 | 122.4   | 0.968   | 108.8   | 0.952        | 115.6   |
| D19-S2  | 0.750 | 81.4    | 0.949   | 92.2    | 0.850        | 86.8    |
| D19-S3  | 0.883 | 90.1    | 0.946   | 98.5    | 0.915        | 94.3    |
| D19-S4  | 0.843 | 90.7    | 0.952   | 100.0   | 0.898        | 95.4    |
| D19-S5  | 0.961 | 103.9   | 0.977   | 104.5   | 0.969        | 104.2   |
| D19-S6  | 0.973 | 80.8    | 0.945   | 87.2    | 0.959        | 84.0    |
| D19-S7  | 0.985 | 89.3    | 0.939   | 94.0    | 0.962        | 91.7    |
| D19-S8  | 0.954 | 141.6   | 0.951   | 95.4    | 0.953        | 118.5   |
| D19-S9  | 0.975 | 77.7    | 0.948   | 105.7   | 0.962        | 91.7    |
| D19-S10 | 0.973 | 92.2    | 0.973   | 90.6    | 0.973        | 91.4    |
| D19-S11 | 0.977 | 96.6    | 0.972   | 91.0    | 0.975        | 93.8    |
| D19-S12 | 0.991 | 89.5    | 0.960   | 111.0   | 0.976        | 100.3   |
| D19-S13 | 0.977 | 101.9   | 0.968   | 83.0    | 0.973        | 92.5    |
| D19-S14 | 0.954 | 80.2    | 0.948   | 83.4    | 0.951        | 81.8    |
| D19-S15 | 0.939 | 106.5   | 0.969   | 103.3   | 0.954        | 104.9   |
| D19-S16 | 0.952 | 68.3    | 0.964   | 98.1    | 0.958        | 83.2    |
| D19-S17 | 0.965 | 112.2   | 0.956   | 108.8   | 0.961        | 110.5   |

---

|         |       |       |       |       |       |       |
|---------|-------|-------|-------|-------|-------|-------|
| D20-S1  | 0.954 | 132.4 | 0.940 | 92.1  | 0.947 | 112.3 |
| D20-S2  | 0.794 | 72.1  | 0.947 | 92.8  | 0.871 | 82.5  |
| D20-S3  | 0.836 | 99.9  | 0.920 | 100.6 | 0.878 | 100.3 |
| D20-S4  | 0.930 | 95.7  | 0.957 | 87.1  | 0.944 | 91.4  |
| D20-S5  | 0.870 | 92.0  | 0.932 | 88.1  | 0.901 | 90.1  |
| D20-S6  | 0.974 | 125.6 | 0.965 | 98.0  | 0.970 | 111.8 |
| D20-S7  | 0.980 | 87.5  | 0.922 | 111.5 | 0.951 | 99.5  |
| D20-S8  | 0.979 | 97.2  | 0.939 | 87.9  | 0.959 | 92.6  |
| D20-S9  | 0.971 | 111.1 | 0.954 | 97.6  | 0.963 | 104.4 |
| D20-S10 | 0.976 | 85.9  | 0.834 | 105.5 | 0.905 | 95.7  |
| D20-S11 | 0.978 | 121.8 | 0.969 | 98.0  | 0.974 | 109.9 |
| D20-S12 | 0.974 | 133.0 | 0.973 | 95.7  | 0.974 | 114.4 |
| D20-S13 | 0.974 | 112.4 | 0.967 | 100.8 | 0.971 | 106.6 |
| D20-S14 | 0.932 | 86.7  | 0.974 | 110.2 | 0.953 | 98.5  |
| D21-S1  | 0.970 | 86.0  | 0.950 | 105.6 | 0.960 | 95.8  |
| D21-S2  | 0.962 | 86.6  | 0.928 | 95.9  | 0.945 | 91.3  |
| D21-S3  | 0.964 | 73.2  | 0.960 | 87.0  | 0.962 | 80.1  |
| D21-S4  | 0.968 | 75.9  | 0.978 | 117.3 | 0.973 | 96.6  |
| D21-S5  | 0.952 | 96.9  | 0.965 | 116.2 | 0.959 | 106.6 |
| D21-S6  | 0.950 | 98.4  | 0.908 | 109.2 | 0.929 | 103.8 |
| D21-S7  | 0.914 | 73.3  | 0.944 | 103.7 | 0.929 | 88.5  |
| D21-S8  | 0.966 | 90.0  | 0.967 | 118.6 | 0.967 | 104.3 |
| D21-S9  | 0.966 | 117.2 | 0.959 | 105.4 | 0.963 | 111.3 |
| D21-S10 | 0.952 | 68.7  | 0.950 | 121.1 | 0.951 | 94.9  |
| D21-S11 | 0.949 | 93.4  | 0.951 | 123.9 | 0.950 | 108.7 |
| D21-S12 | 0.947 | 78.0  | 0.953 | 149.5 | 0.950 | 113.8 |
| D21-S13 | 0.927 | 76.8  | 0.966 | 122.8 | 0.947 | 99.8  |
| D21-S14 | 0.955 | 80.3  | 0.937 | 113.9 | 0.946 | 97.1  |
| D21-S15 | 0.917 | 94.3  | 0.929 | 118.0 | 0.923 | 106.2 |
| D21-S16 | 0.965 | 118.0 | 0.962 | 120.4 | 0.964 | 119.2 |
| D21-S17 | 0.937 | 75.0  | 0.936 | 131.1 | 0.937 | 103.1 |
| D21-S18 | 0.957 | 74.6  | 0.974 | 115.7 | 0.966 | 95.2  |
| E17-S1  | 0.953 | 112.4 | 0.986 | 97.9  | 0.970 | 105.2 |
| E17-S2  | 0.965 | 106.5 | 0.978 | 107.7 | 0.972 | 107.1 |
| E17-S3  | 0.968 | 119.9 | 0.947 | 104.9 | 0.958 | 112.4 |
| E17-S4  | 0.944 | 79.5  | 0.965 | 86.6  | 0.955 | 83.1  |
| E17-S5  | 0.972 | 84.8  | 0.976 | 102.5 | 0.974 | 93.7  |
| E17-S6  | 0.982 | 98.9  | 0.975 | 104.0 | 0.979 | 101.5 |
| E17-S7  | 0.962 | 93.2  | 0.980 | 96.7  | 0.971 | 95.0  |
| E17-S8  | 0.957 | 80.8  | 0.976 | 84.6  | 0.967 | 82.7  |
| E17-S9  | 0.984 | 94.0  | 0.952 | 85.8  | 0.968 | 89.9  |
| E18-S1  | 0.976 | 121.8 | 0.912 | 104.4 | 0.944 | 113.1 |
| E18-S2  | 0.975 | 111.9 | 0.965 | 90.4  | 0.970 | 101.2 |



---

|         |       |       |       |       |       |       |
|---------|-------|-------|-------|-------|-------|-------|
| E18-S3  | 0.977 | 109.6 | 0.953 | 101.3 | 0.965 | 105.5 |
| E18-S4  | 0.977 | 111.7 | 0.956 | 87.0  | 0.967 | 99.4  |
| E18-S5  | 0.979 | 103.0 | 0.956 | 98.7  | 0.968 | 100.9 |
| E18-S6  | 0.977 | 103.9 | 0.947 | 98.2  | 0.962 | 101.1 |
| E18-S7  | 0.961 | 89.6  | 0.965 | 100.3 | 0.963 | 95.0  |
| E18-S8  | 0.963 | 91.7  | 0.950 | 103.3 | 0.957 | 97.5  |
| E18-S9  | 0.962 | 86.5  | 0.958 | 95.5  | 0.960 | 91.0  |
| E18-S10 | 0.983 | 108.5 | 0.988 | 84.6  | 0.986 | 96.6  |
| E18-S11 | 0.969 | 112.4 | 0.977 | 96.0  | 0.973 | 104.2 |
| E18-S12 | 0.933 | 62.6  | 0.972 | 102.9 | 0.953 | 82.8  |
| E19-S1  | 0.884 | 103.0 | 0.954 | 94.9  | 0.919 | 99.0  |
| E19-S2  | 0.785 | 105.5 | 0.968 | 98.2  | 0.877 | 101.9 |
| E19-S3  | 0.954 | 72.8  | 0.966 | 96.8  | 0.960 | 84.8  |
| E19-S4  | 0.965 | 89.2  | 0.986 | 90.0  | 0.976 | 89.6  |
| E19-S5  | 0.954 | 179.1 | 0.972 | 90.4  | 0.963 | 134.8 |
| E19-S6  | 0.969 | 123.1 | 0.955 | 94.2  | 0.962 | 108.7 |
| E19-S7  | 0.946 | 90.1  | 0.956 | 96.1  | 0.951 | 93.1  |
| E19-S8  | 0.975 | 81.9  | 0.977 | 97.3  | 0.976 | 89.6  |
| E19-S9  | 0.973 | 93.5  | 0.960 | 91.7  | 0.967 | 92.6  |
| E19-S10 | 0.960 | 113.3 | 0.989 | 90.1  | 0.975 | 101.7 |
| E19-S11 | 0.972 | 101.3 | 0.985 | 94.3  | 0.979 | 97.8  |
| E19-S12 | 0.965 | 97.7  | 0.963 | 88.0  | 0.964 | 92.9  |
| E20-S1  | 0.970 | 123.0 | 0.963 | 91.7  | 0.967 | 107.4 |
| E20-S2  | 0.843 | 113.1 | 0.956 | 101.1 | 0.900 | 107.1 |
| E20-S3  | 0.942 | 93.0  | 0.965 | 85.9  | 0.954 | 89.5  |
| E20-S4  | 0.971 | 109.8 | 0.944 | 103.5 | 0.958 | 106.7 |
| E20-S5  | 0.962 | 99.7  | 0.972 | 92.7  | 0.967 | 96.2  |
| E20-S6  | 0.940 | 156.1 | 0.957 | 98.3  | 0.949 | 127.2 |
| E20-S7  | 0.939 | 103.7 | 0.949 | 102.6 | 0.944 | 103.2 |
| E20-S8  | 0.951 | 67.5  | 0.979 | 91.5  | 0.965 | 79.5  |
| E20-S9  | 0.975 | 108.6 | 0.977 | 89.7  | 0.976 | 99.2  |
| E20-S10 | 0.971 | 79.6  | 0.973 | 82.8  | 0.972 | 81.2  |
| E20-S11 | 0.970 | 98.9  | 0.984 | 89.3  | 0.977 | 94.1  |
| E20-S12 | 0.976 | 160.8 | 0.954 | 102.8 | 0.965 | 131.8 |
| E21-S1  | 0.964 | 103.8 | 0.948 | 107.6 | 0.956 | 105.7 |
| E21-S2  | 0.962 | 87.5  | 0.944 | 70.5  | 0.953 | 79.0  |
| E21-S3  | 0.964 | 68.7  | 0.956 | 90.1  | 0.960 | 79.4  |
| E21-S4  | 0.960 | 104.0 | 0.954 | 90.4  | 0.957 | 97.2  |
| E21-S5  | 0.965 | 86.6  | 0.965 | 98.3  | 0.965 | 92.5  |
| E21-S6  | 0.966 | 89.2  | 0.926 | 98.2  | 0.946 | 93.7  |
| E21-S7  | 0.959 | 102.1 | 0.935 | 97.9  | 0.947 | 100.0 |
| E21-S8  | 0.953 | 87.2  | 0.971 | 124.6 | 0.962 | 105.9 |
| E21-S9  | 0.966 | 92.7  | 0.956 | 107.0 | 0.961 | 99.9  |

---

|         |       |       |       |       |       |       |
|---------|-------|-------|-------|-------|-------|-------|
| E21-S10 | 0.958 | 99.8  | 0.909 | 99.3  | 0.934 | 99.6  |
| E21-S11 | 0.954 | 77.3  | 0.966 | 83.9  | 0.960 | 80.6  |
| E21-S12 | 0.976 | 112.8 | 0.958 | 100.5 | 0.967 | 106.7 |
| E21-S13 | 0.954 | 89.9  | 0.951 | 107.4 | 0.953 | 98.7  |
| E21-S14 | 0.970 | 93.8  | 0.955 | 98.0  | 0.963 | 95.9  |
| E21-S15 | 0.963 | 97.8  | 0.961 | 93.9  | 0.962 | 95.9  |
| E21-S16 | 0.963 | 105.7 | 0.930 | 93.2  | 0.947 | 99.5  |
| E21-S17 | 0.901 | 139.3 | 0.986 | 97.8  | 0.944 | 118.6 |
| E21-S18 | 0.954 | 105.7 | 0.940 | 104.0 | 0.947 | 104.9 |
| E21-S19 | 0.966 | 110.5 | 0.972 | 110.3 | 0.969 | 110.4 |
| E21-S20 | 0.965 | 96.1  | 0.954 | 98.2  | 0.960 | 97.2  |
| E21-S21 | 0.928 | 72.0  | 0.952 | 113.2 | 0.940 | 92.6  |
| E21-S22 | 0.963 | 82.7  | 0.922 | 106.5 | 0.943 | 94.6  |
| E21-S23 | 0.962 | 87.1  | 0.974 | 93.3  | 0.968 | 90.2  |
| E21-S24 | 0.965 | 88.3  | 0.940 | 114.2 | 0.953 | 101.3 |
| E21-S25 | 0.953 | 93.9  | 0.962 | 106.0 | 0.958 | 100.0 |
| Q17-S1  | 0.971 | 114.0 | 0.948 | 98.7  | 0.960 | 106.4 |
| Q17-S2  | 0.972 | 140.1 | 0.970 | 107.1 | 0.971 | 123.6 |
| Q17-S3  | 0.944 | 106.7 | 0.963 | 107.9 | 0.954 | 107.3 |
| Q17-S4  | 0.958 | 121.1 | 0.960 | 101.9 | 0.959 | 111.5 |
| Q17-S5  | 0.961 | 150.3 | 0.991 | 94.8  | 0.976 | 122.6 |
| Q17-S6  | 0.980 | 105.3 | 0.987 | 97.4  | 0.984 | 101.4 |
| Q17-S7  | 0.982 | 109.7 | 0.980 | 92.1  | 0.981 | 100.9 |
| Q17-S8  | 0.947 | 77.7  | 0.976 | 99.9  | 0.962 | 88.8  |
| Q17-S9  | 0.987 | 98.2  | 0.955 | 96.4  | 0.971 | 97.3  |
| Q18-S1  | 0.943 | 102.7 | 0.933 | 99.7  | 0.938 | 101.2 |
| Q18-S2  | 0.966 | 144.1 | 0.969 | 102.8 | 0.968 | 123.5 |
| Q18-S3  | 0.975 | 104.5 | 0.975 | 92.2  | 0.975 | 98.4  |
| Q18-S4  | 0.976 | 104.6 | 0.957 | 98.1  | 0.967 | 101.4 |
| Q18-S5  | 0.963 | 121.2 | 0.973 | 105.5 | 0.968 | 113.4 |
| Q18-S6  | 0.976 | 109.3 | 0.970 | 116.3 | 0.973 | 112.8 |
| Q18-S7  | 0.969 | 105.4 | 0.949 | 96.7  | 0.959 | 101.1 |
| Q18-S8  | 0.965 | 81.9  | 0.974 | 92.0  | 0.970 | 87.0  |
| Q18-S9  | 0.986 | 107.0 | 0.935 | 94.3  | 0.961 | 100.7 |
| Q18-S10 | 0.985 | 110.6 | 0.968 | 92.3  | 0.977 | 101.5 |
| Q18-S11 | 0.973 | 78.5  | 0.952 | 90.7  | 0.963 | 84.6  |
| Q18-S12 | 0.955 | 77.9  | 0.977 | 100.0 | 0.966 | 89.0  |
| Q19-S1  | 0.945 | 185.4 | 0.960 | 109.6 | 0.953 | 147.5 |
| Q19-S2  | 0.972 | 123.6 | 0.978 | 102.4 | 0.975 | 113.0 |
| Q19-S3  | 0.976 | 119.9 | 0.954 | 103.8 | 0.965 | 111.9 |
| Q19-S4  | 0.973 | 110.3 | 0.963 | 104.4 | 0.968 | 107.4 |
| Q19-S5  | 0.979 | 135.3 | 0.964 | 111.3 | 0.972 | 123.3 |
| Q19-S6  | 0.974 | 126.8 | 0.977 | 106.2 | 0.976 | 116.5 |

---

|        |       |       |       |       |       |       |
|--------|-------|-------|-------|-------|-------|-------|
| Q19-S7 | 0.973 | 129.1 | 0.969 | 82.6  | 0.971 | 105.9 |
| Q19-S8 | 0.963 | 118.3 | 0.972 | 90.2  | 0.968 | 104.3 |
| Q19-S9 | 0.970 | 118.0 | 0.958 | 95.9  | 0.964 | 107.0 |
| Q20-S1 | 0.964 | 107.0 | 0.979 | 112.5 | 0.972 | 109.8 |
| Q20-S2 | 0.973 | 105.8 | 0.962 | 97.5  | 0.968 | 101.7 |
| Q20-S3 | 0.947 | 119.0 | 0.984 | 94.6  | 0.966 | 106.8 |
| Q20-S4 | 0.972 | 117.5 | 0.960 | 102.4 | 0.966 | 110.0 |
| Q20-S5 | 0.970 | 99.5  | 0.981 | 101.6 | 0.976 | 100.6 |
| Q20-S6 | 0.972 | 98.8  | 0.906 | 105.9 | 0.939 | 102.4 |
| Q20-S7 | 0.964 | 132.2 | 0.952 | 97.2  | 0.958 | 114.7 |
| Q20-S8 | 0.974 | 132.0 | 0.976 | 85.2  | 0.975 | 108.6 |
| Q21-S1 | 0.969 | 94.7  | 0.943 | 73.2  | 0.956 | 84.0  |
| Q21-S2 | 0.965 | 90.6  | 0.947 | 95.5  | 0.956 | 93.1  |
| Q21-S3 | 0.955 | 96.8  | 0.947 | 88.8  | 0.951 | 92.8  |
| Q21-S4 | 0.953 | 112.9 | 0.961 | 108.6 | 0.957 | 110.8 |
| Q21-S5 | 0.963 | 87.2  | 0.978 | 122.2 | 0.971 | 104.7 |
| Q21-S6 | 0.965 | 113.5 | 0.966 | 98.3  | 0.966 | 105.9 |
| Q21-S7 | 0.969 | 86.6  | 0.936 | 94.5  | 0.953 | 90.6  |
| QT-S1  | 0.984 | 102.3 | 0.935 | 98.7  | 0.960 | 100.5 |
| QT-S2  | 0.892 | 136.1 | 0.964 | 103.1 | 0.928 | 119.6 |
| QT-S3  | 0.889 | 125.8 | 0.974 | 100.0 | 0.932 | 112.9 |
| QT-S4  | 0.667 | 180.4 | 0.926 | 112.1 | 0.797 | 146.3 |
| QT-S5  | 0.913 | 202.3 | 0.933 | 103.9 | 0.923 | 153.1 |
| QT-S6  | 0.949 | 65.9  | 0.965 | 113.4 | 0.957 | 89.7  |
| QT-S7  | 0.628 | 111.7 | 0.931 | 99.8  | 0.780 | 105.8 |
| QT-S8  | 0.730 | 305.6 | 0.972 | 112.8 | 0.851 | 209.2 |
| QT-S9  | 0.688 | 248.5 | 0.965 | 116.1 | 0.827 | 182.3 |
| QT-S10 | 0.706 | 221.9 | 0.963 | 107.8 | 0.835 | 164.9 |
| QT-S11 | 0.728 | 181.1 | 0.942 | 107.8 | 0.835 | 144.5 |
| QT-S12 | 0.912 | 175.3 | 0.926 | 120.0 | 0.919 | 147.7 |

---
